# Supplementary material for: On the identification of potential regulatory variants within genome wide association candidate SNP sets
Source: PubMed Central journal article supplement (PMC4066296; doi:10.1186/1755-8794-7-34), 2014-06-11

A

## Heatmap: Overlapping regions in percentage

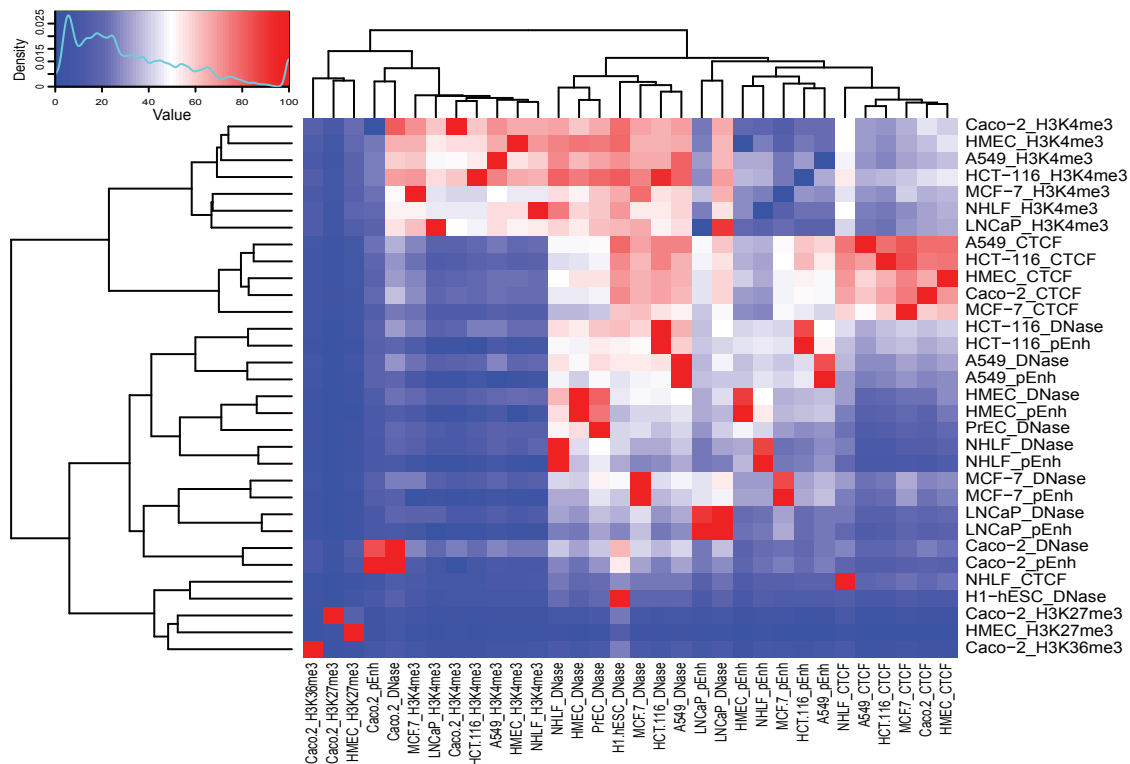

B

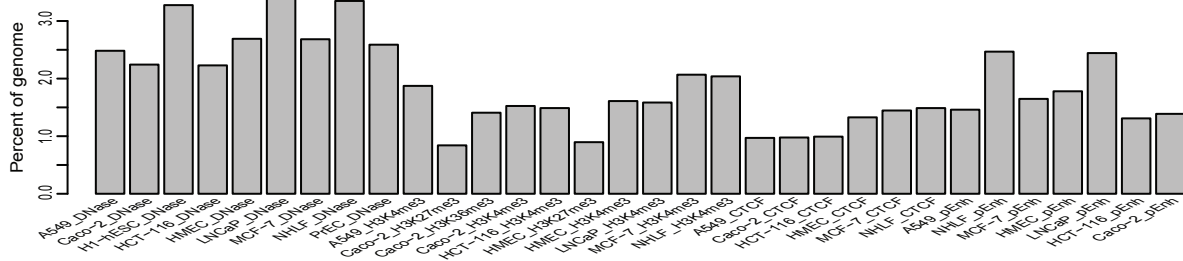

Supplement: 1755-8794-7-34-S3.pdf [file 1755-8794-7-34-S3.pdf]
